# Supplementary material for: Chicken eEF1α is a Critical Factor for the Polymerase Complex Activity of Very Virulent Infectious Bursal Disease Virus
Source: PubMed Central journal article supplement (PMC7077273; doi:10.3390/v12020249), 2020-02-23
Supplement: viruses-12-00249-s001.pdf [file viruses-12-00249-s001.pdf]

**S Table 1. Potential host proteins identified by LC-MS/MS with proper molecular weight**

| <b>Protein band No.</b> | <b>Reference No.</b> | <b>Protein/Gene names</b>                                | <b>UniquePepCount</b> | <b>CoverPercent(%)</b> | <b>MW (kDa)</b> | <b>PI</b> | <b>Molecular function</b>                                     |
|-------------------------|----------------------|----------------------------------------------------------|-----------------------|------------------------|-----------------|-----------|---------------------------------------------------------------|
|                         | tr F1NJ08            | Vimentin                                                 | 28                    | 46.3                   | 53.21           | 5.13      | identical protein binding                                     |
|                         | tr F1N4MU            | Tubulin beta chain                                       | 10                    | 21.56                  | 50.43           | 4.86      | structural constituent of cytoskeleton                        |
|                         | sp Q5ZMA2            | Pre-mRNA-processing factor 19                            | 9                     | 16.44                  | 55.13           | 6.19      | ubiquitin protein ligase activity                             |
|                         | tr A0A1D5PU77        | ATP synthase subunit beta<br>Probable                    | 8                     | 20.26                  | 56.63           | 5.44      | /                                                             |
|                         | sp Q5ZKB9            | ATP-dependent RNA helicase DDX6                          | 7                     | 13.04                  | 54.42           | 8.85      | ATP binding;helicase activity                                 |
| 1                       | tr A0A1D5PEV1        | CUGBP Elav-like family member 2                          | 5                     | 8.27                   | 55.42           | 8.81      | RNA binding                                                   |
|                         | tr A0A1D5P1F1        | Sphingosine kinase 1                                     | 4                     | 8.07                   | 54.72           | 8.78      | sphingosine kinase activity                                   |
|                         | tr A0A1D5PMQ5        | KRTC42L                                                  | 3                     | 5.81                   | 54.00           | 4.92      | structural molecule activity;                                 |
|                         | tr F1N8Z4            | RuvB-like helicase                                       | 3                     | 5.92                   | 50.18           | 6.02      | transcription coactivator activity                            |
|                         | tr F1N9H4            | Elongation factor 1-alpha                                | 3                     | 6.48                   | 50.47           | 9.11      | translation elongation factor activity;protein kinase binding |
|                         | sp Q5ZMS3            | Eukaryotic translation initiation factor 2 subunit gamma | 2                     | 3.39                   | 51.08           | 8.54      | translation initiation factor activity;GTPase activity        |
|                         | tr Q5ZM95            | RCJMB04_2m14                                             | 2                     | 5.28                   | 53.63           | 5.64      | RNA binding                                                   |

|               |                                                                   |   |       |       |      |                                                   |
|---------------|-------------------------------------------------------------------|---|-------|-------|------|---------------------------------------------------|
| sp O13154     | Protein kinase C and casein kinase substrate in neurons protein 2 | 1 | 1.56  | 51.97 | 5.24 | cytoskeletal protein binding;phospholipid binding |
| tr A0A1C9UAS5 | NADH-ubiquinone oxidoreductase chain 4                            | 1 | 1.31  | 51.12 | 9.56 | NADH dehydrogenase (ubiquinone) activity          |
| tr A0A1D5P0Q1 | Serine hydroxymethyl transferase                                  | 1 | 1.91  | 51.71 | 8.36 | /                                                 |
| tr A0A1D5P8M8 | LRR binding FLII interacting protein 2                            | 1 | 1.54  | 52.04 | 5.36 | regulation of transcription                       |
| tr A0A1D5PVC5 | Uncharacterized protein                                           | 1 | 1.62  | 56.68 | 9    | /                                                 |
| tr A0A1D5PXW3 | Transmembrane and coiled-coil domain family 2                     | 1 | 1.46  | 53.21 | 5.82 | amyloid precursor protein metabolic process       |
| tr A0A1L1RJ97 | Basal body orientation factor 1                                   | 1 | 1.74  | 54.32 | 8.76 | /                                                 |
| tr A0A2Y9V195 | Glycosylation site-binding protein                                | 1 | 2.76  | 56.89 | 4.84 | protein disulfide isomerase activity              |
| tr E1C0C2     | Scm polycomb group protein like 4                                 | 1 | 1.62  | 53.44 | 9.51 | /                                                 |
| tr F1NYI3     | tRNA-splicing ligase RtcB homolog                                 | 1 | 1.78  | 55.24 | 6.79 | RNA ligase (ATP) activity;vinculin binding        |
| tr F1P5U6     | CYP2C18                                                           | 1 | 1.82  | 55.76 | 8.71 | heme binding;iron ion binding                     |
| tr Q5ZMN1     | G3BP stress granule assembly factor 1                             | 1 | 2.12  | 52.44 | 5.11 | mRNA binding;                                     |
| tr A0A1X9WEL5 | Elongation factor Tu                                              | 7 | 17.09 | 47.11 | 6.8  | translation elongation factor activity            |

|   |                   |                                                                                                      |   |       |       |      |                                                                        |
|---|-------------------|------------------------------------------------------------------------------------------------------|---|-------|-------|------|------------------------------------------------------------------------|
| 2 | tr E1BTT4         | Hydroxyacyl-CoA<br>dehydrogenase<br>trifunctional<br>multienzyme complex<br>subunit beta<br>DDB1-and | 7 | 13.5  | 50.85 | 9.37 | acetyl-CoA C-acyltransferase activity;<br>enoyl-CoA hydratase activity |
|   | sp Q5ZLK1         | CUL4-associated factor<br>13                                                                         | 6 | 11.69 | 51.43 | 9.45 | Ribonucleoprotein                                                      |
|   | tr F1NDE0         | 39S ribosomal protein<br>L37, mitochondrial                                                          | 5 | 8.97  | 49.89 | 9.59 | structural constituent of ribosome                                     |
|   | tr F1NRU5         | NIN1 (RPN12) binding<br>protein 1 homolog                                                            | 5 | 9.86  | 47.29 | 8.42 | Endoribonuclease activity;metal ion binding                            |
|   | tr A0A1L1RMC<br>2 | ATP synthase subunit<br>alpha                                                                        | 4 | 8.04  | 50.07 | 9.12 | /                                                                      |
|   | tr F1NNS          | Oligosaccharyl<br>transferase 48 kDa<br>subunit                                                      | 4 | 8.31  | 47.94 | 5.35 | dolichyl-diphosphooligosaccharide-protein<br>glycotransferase activity |
|   | tr Q6EE30         | Eukaryotic translation<br>elongation factor 1                                                        | 4 | 8.03  | 49.73 | 6.12 | translation elongation factor activity                                 |
|   | sp P51913         | Alpha-enolase                                                                                        | 3 | 5.3   | 47.30 | 6.17 | phosphopyruvate hydratase activity                                     |
|   | tr E1BR36         | Actin like 6A                                                                                        | 3 | 7.23  | 47.48 | 5.48 | chromatin binding                                                      |
|   | tr Q5ZLB0         | DEAD-box helicase 47                                                                                 | 3 | 7.28  | 50.24 | 9.32 | helicase activity; nucleic acid binding                                |
|   | sp Q5ZLT7         | Basic leucine zipper and<br>W2 domain-containing<br>protein 1                                        | 2 | 4.31  | 48.02 | 5.75 | Transcription regulation                                               |
|   | tr A0A1D5P198     | Tubulin alpha chain                                                                                  | 2 | 4.21  | 50.15 | 4.94 | GTP binding; ubiquitin protein ligase binding                          |

|   |               |                                                          |   |       |       |       |                                                                            |
|---|---------------|----------------------------------------------------------|---|-------|-------|-------|----------------------------------------------------------------------------|
|   | tr A0A1D5PX51 | WD repeat-containing protein 76                          | 2 | 5.08  | 49.25 | 8.41  | DNA binding; enzyme binding                                                |
|   | sp Q90WD0     | Actin-like protein 3                                     | 1 | 2.87  | 47.42 | 5.61  | actin filament binding;ATP binding                                         |
|   | tr A0A1D5PCQ0 | Amyloid beta precursor protein binding family A member 1 | 1 | 2.14  | 47.29 | 4.5   | amyloid-beta binding                                                       |
|   | tr A0A1D5PLA1 | 2',3'-cyclic-nucleotide 3'-phosphodiesterase             | 1 | 3.33  | 47.25 | 9.1   | 2',3'-cyclic-nucleotide 3'-phosphodiesterase activity;RNA binding          |
|   | tr E1BS56     | Uncharacterized protein                                  | 1 | 1.88  | 47.74 | 6.71  | serine-type endopeptidase inhibitor activity                               |
|   | tr F1NPA2     | Proteasome 26S subunit, non-ATPase 11                    | 1 | 1.66  | 47.41 | 6.01  | structural molecule activity                                               |
| 3 | sp Q5ZMQ2     | Actin, cytoplasmic 2                                     | 8 | 23.2  | 41.79 | 5.31  | ATP binding; ubiquitin protein ligase binding                              |
|   | tr A0A1D5P694 | RPL4                                                     | 7 | 12.57 | 41.30 | 10.95 | /                                                                          |
|   | tr Q800W4     | TIA1 cytotoxic granule associated RNA binding protein    | 5 | 11.29 | 41.29 | 7.6   | AU-rich element binding                                                    |
|   | tr Q800W3     | TIAR                                                     | 4 | 8.76  | 42.96 | 8.1   | DNA binding;RNA binding                                                    |
|   | tr A0A1L1RNL4 | HNRNPKL                                                  | 3 | 8.89  | 44.66 | 6.57  | DNA binding;RNA binding                                                    |
|   | tr R4GFH1     | CAVIN2                                                   | 3 | 6.89  | 43.38 | 5.02  | protein kinase C binding                                                   |
|   | tr Q8AXQ0     | Translocating chain-associated membrane protein          | 2 | 4.81  | 43.34 | 9.59  | SRP-dependent cotranslational protein targeting to membrane, translocation |
|   | tr A0A1D5PFA1 | Zinc finger C2HC-type containing 1A                      | 2 | 5.25  | 41.71 | 10.12 | /                                                                          |
|   | tr A0A1D5NT89 | Uncharacterized protein                                  | 1 | 1.98  | 40.54 | 6.02  | /                                                                          |
|   | tr A0A1D5P0J2 | Uncharacterized protein                                  | 1 | 1.28  | 40.12 | 11.81 | /                                                                          |

|   |               |                                                                                    |   |       |       |       |                                                       |
|---|---------------|------------------------------------------------------------------------------------|---|-------|-------|-------|-------------------------------------------------------|
|   | tr E1BSZ0     | 1-acylglycerol-3-phosphate O-acyltransferase 5 RNA pseudouridylate synthase domain | 1 | 2.47  | 42.38 | 9.38  | 1-acylglycerol-3-phosphate O-acyltransferase activity |
|   | tr E1BYI6     | Integrin subunit beta 1 binding protein 2                                          | 1 | 2.82  | 40.02 | 10.01 | pseudouridine synthase activity;RNA binding           |
|   | tr E1C4L6     |                                                                                    | 1 | 2.11  | 41.57 | 5.68  | /                                                     |
| 4 | sp P53478     | Actin, cytoplasmic type 5                                                          | 6 | 18.35 | 41.84 | 5.3   | ATP binding                                           |
|   | tr A0A1D5P892 | SRSF6                                                                              | 2 | 5.17  | 40.17 | 11.5  | pre-mRNA binding                                      |
|   | tr A0A1D5NXB3 | Uncharacterized protein                                                            | 1 | 1.9   | 40.94 | 6.72  | RNA binding;zinc ion binding                          |
|   | tr A0A1L1RJL4 | DNA polymerase beta                                                                | 1 | 1.79  | 38.43 | 8.91  | /                                                     |
|   | tr B5BSG4     | MHC class I alpha chain 2                                                          | 1 | 1.97  | 38.82 | 5.71  | /                                                     |
| 5 | sp Q5ZL35     | Arginine and glutamate-rich protein 1                                              | 1 | 2.17  | 33.54 | 10.32 | /                                                     |
|   | tr E1BQM7     | Phosducin like                                                                     | 1 | 2     | 34.43 | 4.61  | positive regulation of smoothed signaling pathway     |
|   | tr E1C8K3     | Annexin                                                                            | 1 | 2.21  | 35.65 | 5.96  | calcium-dependent phospholipid binding                |
|   | tr Q8UWG7     | 60S ribosomal protein L6                                                           | 1 | 2.35  | 33.92 | 10.67 | structural constituent of ribosome                    |
| 6 | tr Q9PTD6     | Ribosomal protein S6 (Fragment)                                                    | 3 | 8.5   | 28.42 | 10.83 | structural constituent of ribosome                    |
|   | sp Q5ZJ56     | 60S ribosomal protein L7                                                           | 1 | 4.07  | 28.78 | 10.83 | structural constituent of ribosome                    |

---

|                   |                              |   |      |       |       |                                    |
|-------------------|------------------------------|---|------|-------|-------|------------------------------------|
| tr A0A1D5PDK<br>5 | Transgelin 2                 | 1 | 3.61 | 27.23 | 9.73  | epithelial cell differentiation    |
| tr A0A1D5PNE4     | 60S ribosomal protein<br>L7a | 1 | 3.08 | 29.33 | 10.48 | /                                  |
| tr Q5ZJC1         | RCJMB04_19g1                 | 1 | 5.33 | 26.86 | 9.68  | structural constituent of ribosome |

---
